# Supplementary material
Source: PubMed Central journal article supplement (PMC3044887)
Supplement: NIHMS34074-supplement-1.pdf [file NIHMS34074-supplement-1.pdf]

## Supplemental Digital Content 1.

Browning et al., Can Neuroimaging Help us to Understand and Classify Somatoform Disorders? A Systematic Review.

### Search Strategy

Medline, Embase and Psycinfo databases were searched for relevant articles published between 1960 and 2009. The search strategy aimed to identify citations relevant to the key concepts of the review (somatoform disorders and neuroimaging) using search terms which were entered as both subject headings and as free text. The diagnostic terms (see figure, below) used in the search included both those used in current diagnostic manuals and the functional somatic syndrome diagnoses such as Irritable Bowel Syndrome (IBS) and Fibromyalgia (FM) which are often used to describe specific somatic symptoms (3). The individual search strategies were then combined at a second level to identify those citations relevant to both somatoform disorders and neuroimaging. The abstracts of these citations were reviewed to identify papers reporting neuroimaging data in clinical populations. Single case studies were only included if they were followed by larger studies using the same methodology. Finally, full text copies of identified citations were obtained and their references reviewed to identify any publications missed by the initial search strategy. A PRISMA type flow diagram of the search strategy is included in Supplemental Digital Content 2.

#### Subject Headings, Somatoform Disorders:

Somatoform Disorders, Psychosomatic Medicine, chronic fatigue syndrome, fibromyalgia, colonic diseases (functional), colonic pseudo-obstruction, irritable bowel syndrome, neurogenic bowel, Psychophysiological Disorders, Multiple Chemical Sensitivity, body dysmorphic disorder, cardiac anxiety, conversion disorder, delusional pregnancy, hypochondriasis, masked depression, psychogenic pain, somatic delusion, functional disease, psychosomatic disorder, factitious disease, neurasthenia, neurodermatitis, somatoform pain disorder, munchausen syndrome, myofascial pain.

#### Text Words, Somatoform Disorders:

Somatoform, somatization, psychosomatic, cfs, chronic fatigue syndrome, fibromyalgia, ibs, irritable bowel syndrome, multiple chemical sensitivity, electrosensitivity, me, myalgic encephalopathy, post viral fatigue, PVFS, functional colonic diseases, colonic pseudo obstruction, neurogenic bowel, conversion disorder, atypical facial pain disorder, functional syndromes, medically unexplained symptoms

#### Subject Headings, Neuroimaging:

Neuroimaging, Magnetic Resonance Imaging, Radionuclide Imaging, tomography (emission-computed), positron-emission tomography, tomography( emission-computed, single-photon), nuclear magnetic resonance imaging, diffusion tensor imaging, diffusion weighted imaging, echo planar imaging, functional magnetic resonance imaging, interventional magnetic resonance imaging, magnetic resonance angiography, perfusion weighted imaging, emission tomography, encephalography, electroencephalography, magentoencephalography

#### Text Words, Neuroimaging:

\$Mri, \$pet, magnetic resonance imaging, neuro imaging, radionuclide imaging, positron emission tomography, single photon emission computed tomography, eeg, meg

**Supplemental Figure.** Terms used in bibliographic search. Records were separately identified as relating to the somatoform disorder and neuroimaging techniques using both the subject headings (exploded) and text words listed. These two strategies were then combined at a second level to identify papers which were relevant to both somatoform disorders and neuroimaging. The subject headings listed are taken from all three databases searched (Medline, Embase and Psycinfo), as each database uses its own ontology there is some repetition in these lists.
