# Supplementary material
Source: PubMed Central journal article supplement (PMC3044887)

**Supplemental Digital Content 2.**

PRISMA type flow chart describing the number of records found in the search and final number identified after screening.

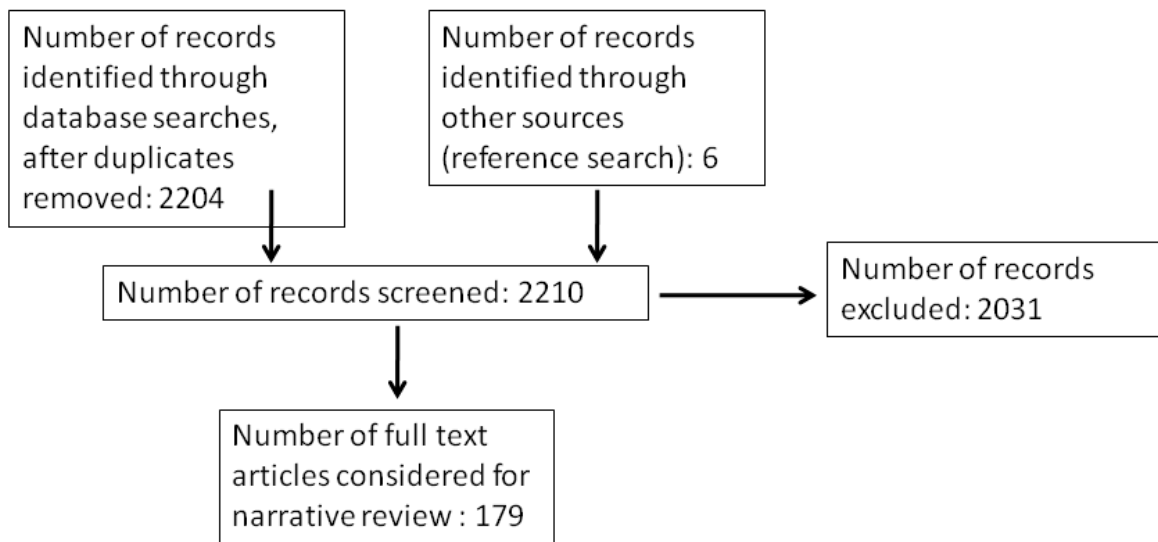

Supplement: NIHMS34074-supplement-2.pdf [file NIHMS34074-supplement-2.pdf]
